# Supplementary material
Source: PubMed Central journal article supplement (PMC4085695)
Supplement: NIHMS596163-supplement-Supplementary_Figures.pdf [file NIHMS596163-supplement-Supplementary_Figures.pdf]

# Supplementary Figure 1

## a

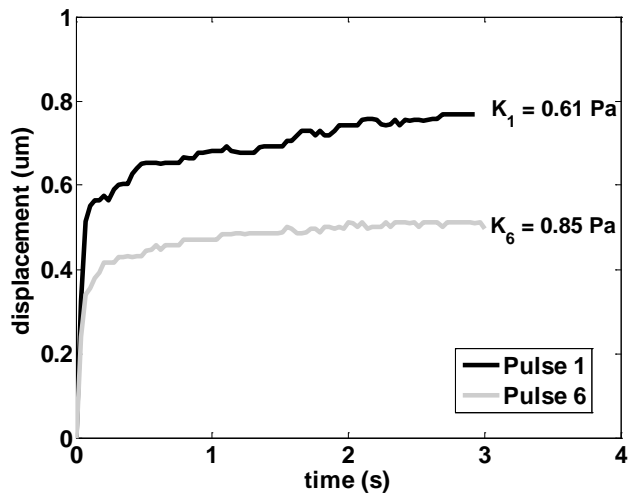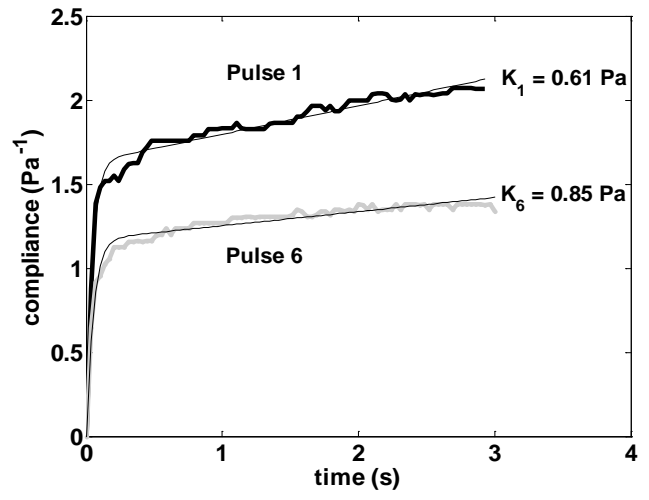

## b

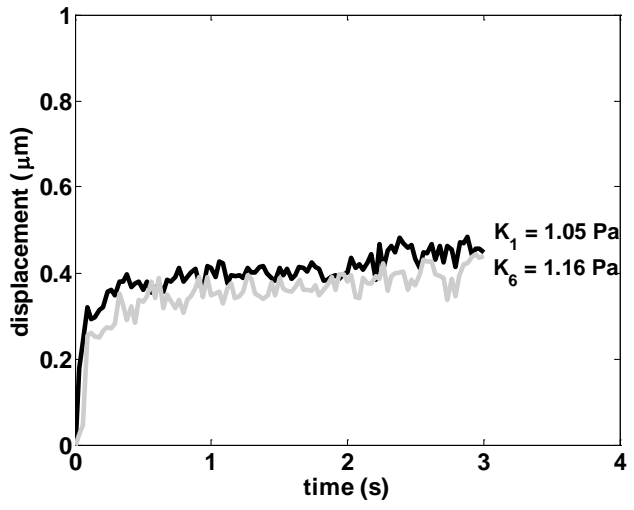

## c

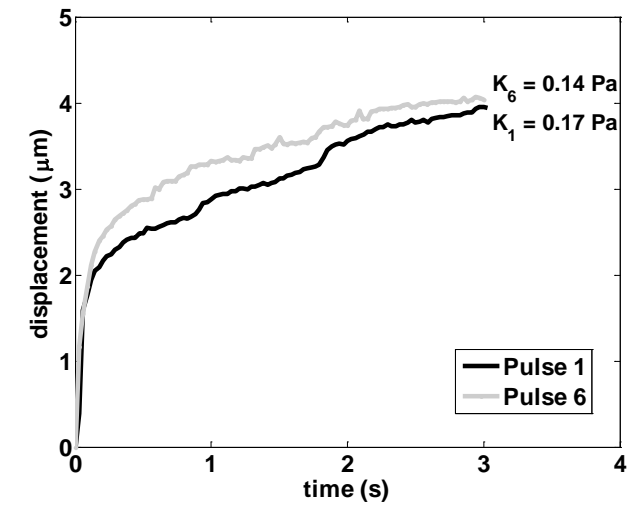

# Supplementary Figure 2

**a**

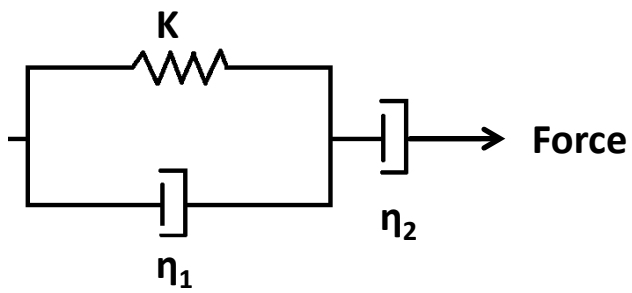

**b**

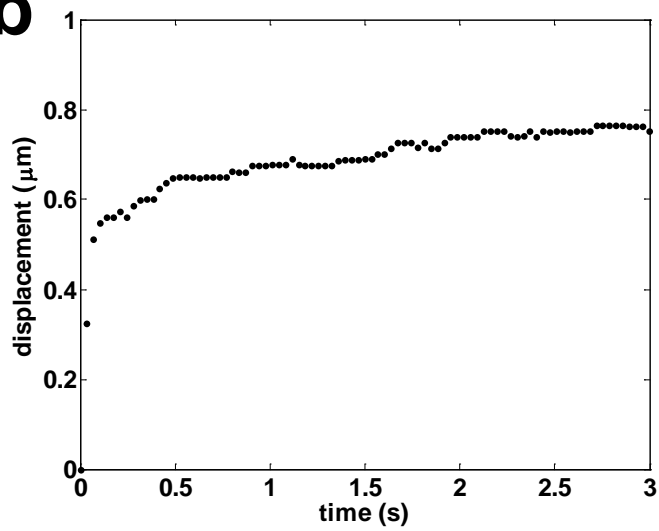

**c**

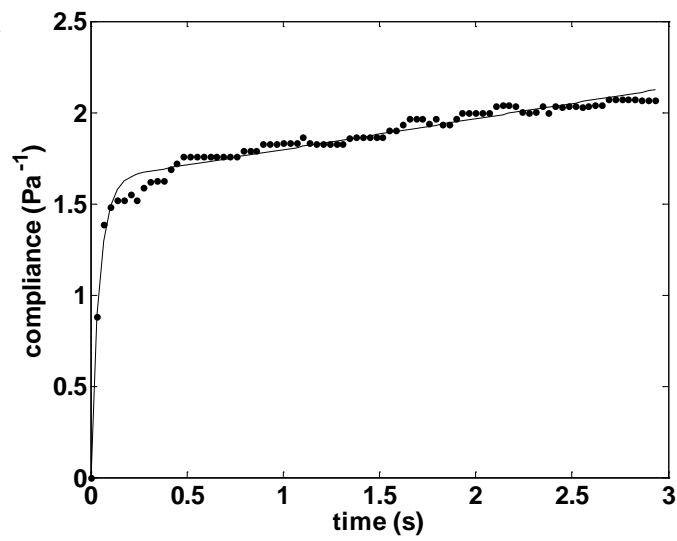

# Supplementary figure 3

**a**

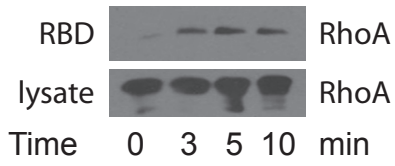

**b**

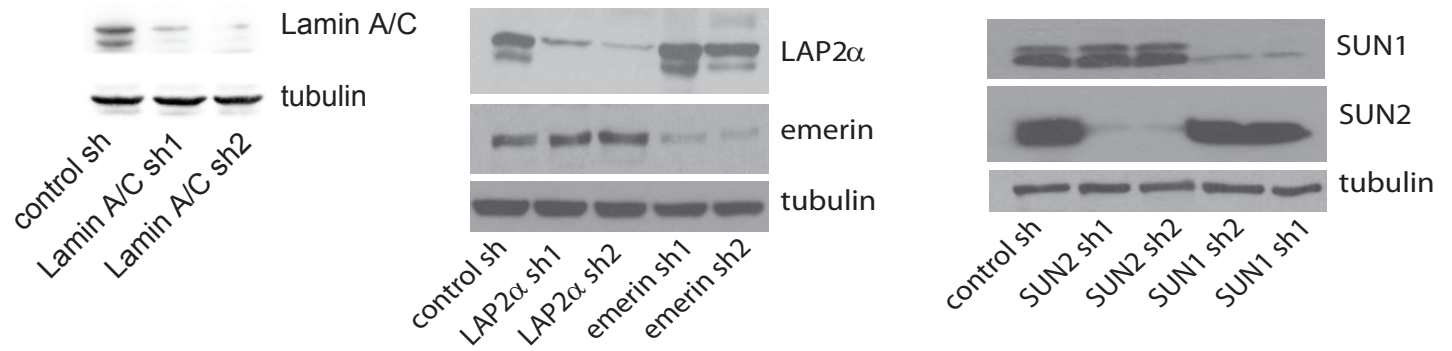

**c**

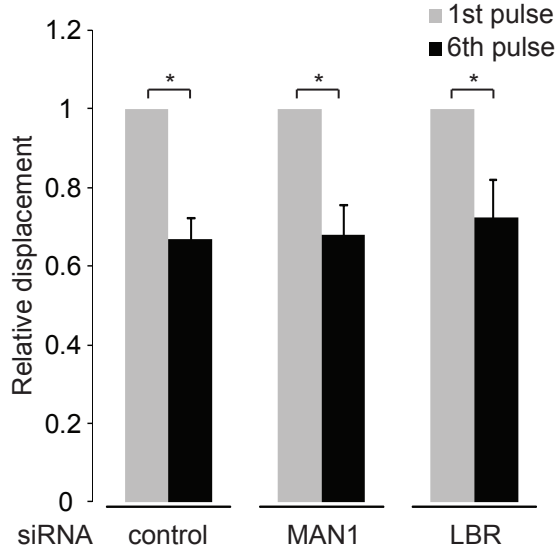

**d**

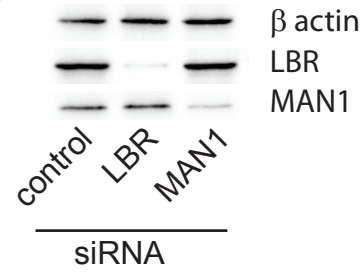

# Supplementary figure 4

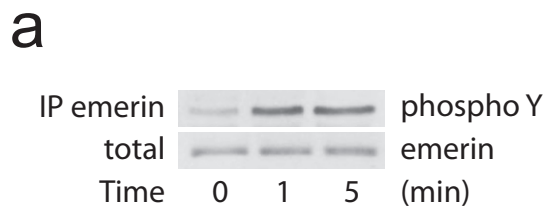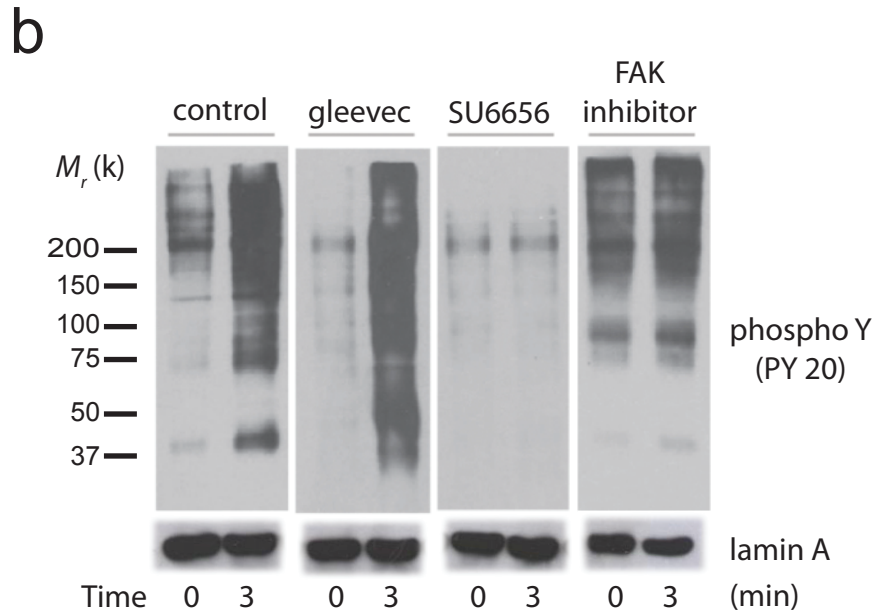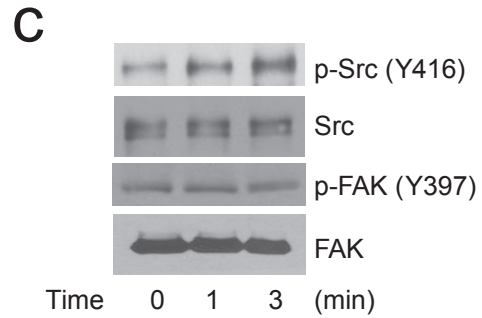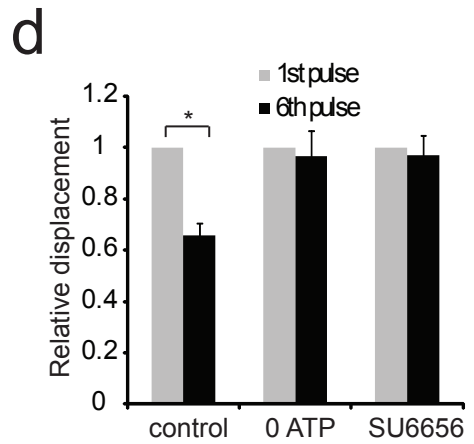

# Supplementary figure 5

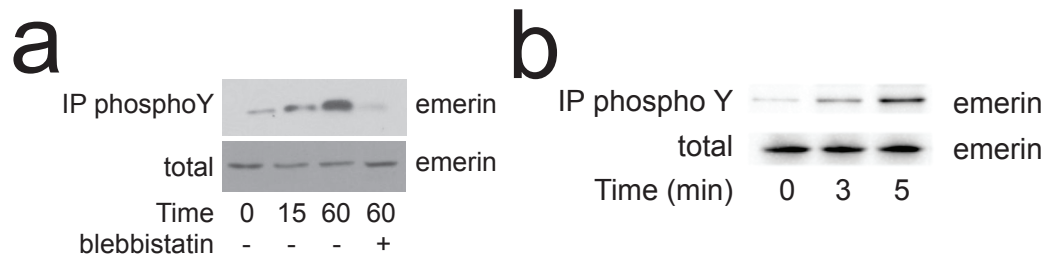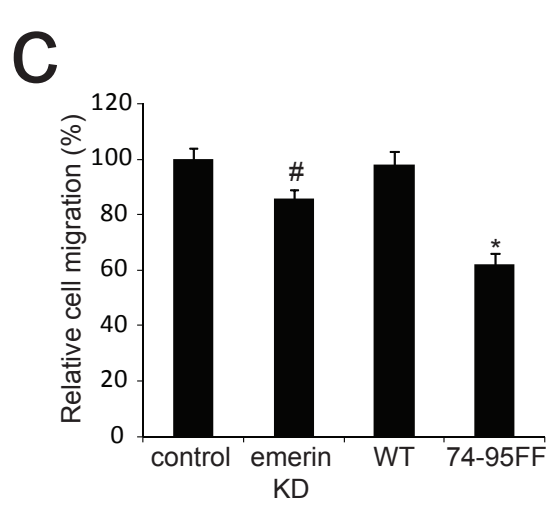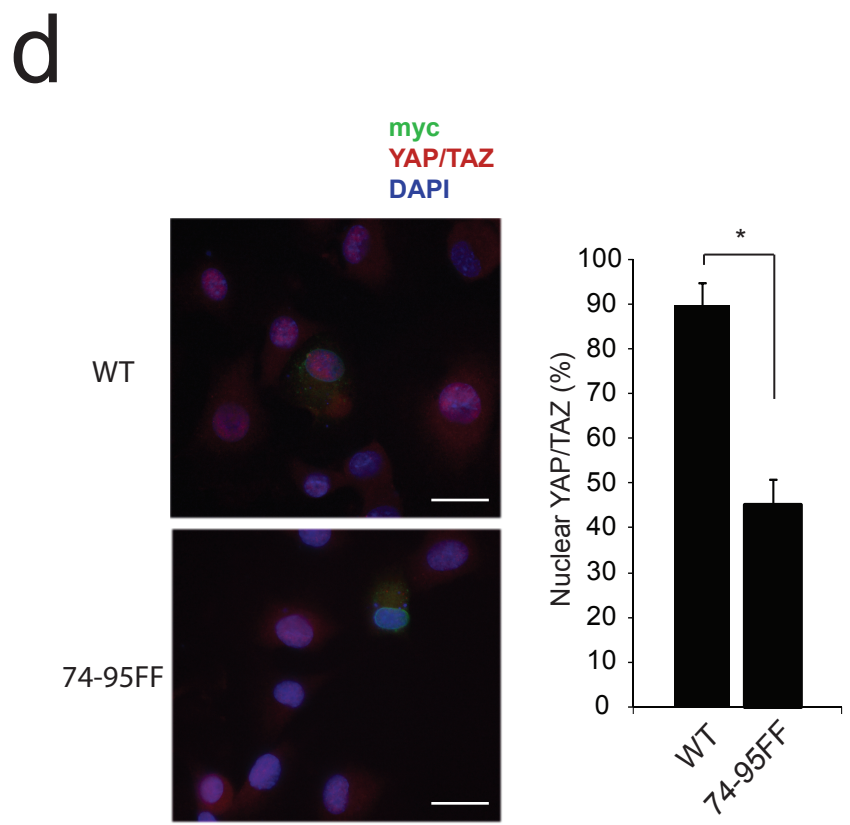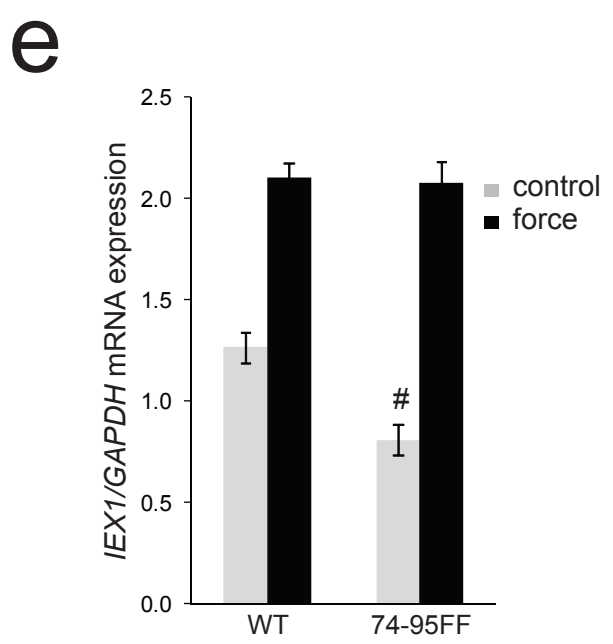

**2d**

lysate

bead complex

75 kD —

75 kD —

lamin B

75 kD —

75 kD —

lamin AC

**3a**

phospho Y  
(PY20)

lamin A

emerin

37 kD —  
25 kD —

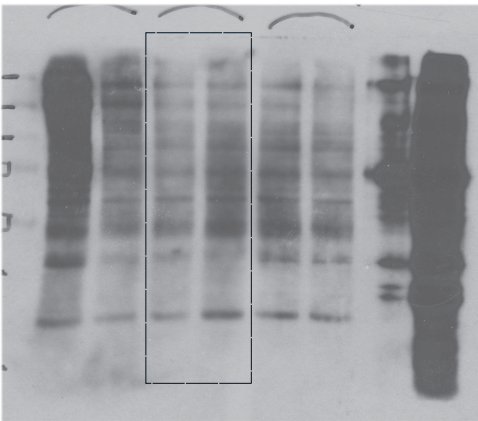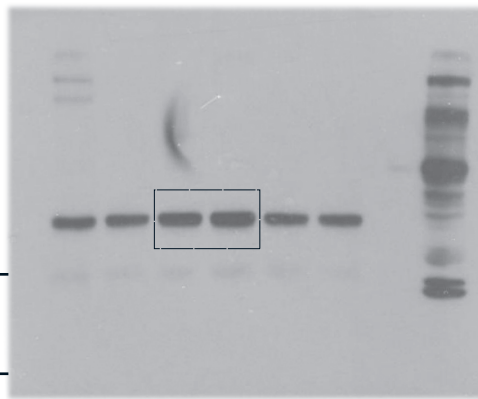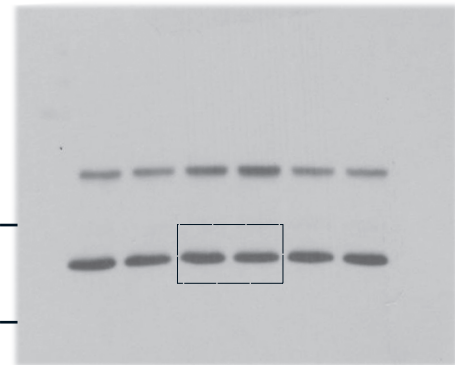

Time 0 3 (min)

**3b**

total cell lysate

myc IP

37 kD —

myc

37 kD —

phospho Y

100 kD —  
75 kD —

lamin AC

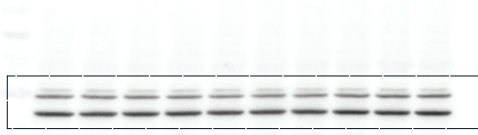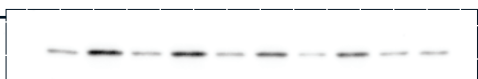

# Supplementary figure 7

3d bead complex

75 kD —

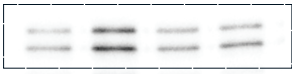

lamin AC

75 kD —

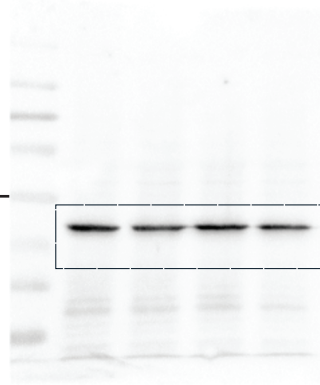

lamin B

3d lysate

lamin AC

75 kD —

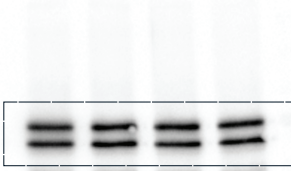

lamin B

75 kD —

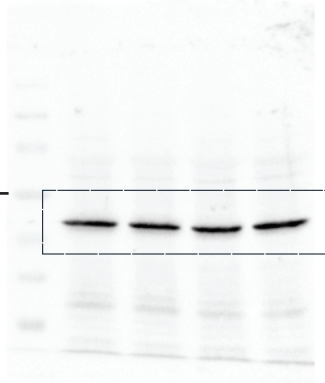

myc

37 kD —

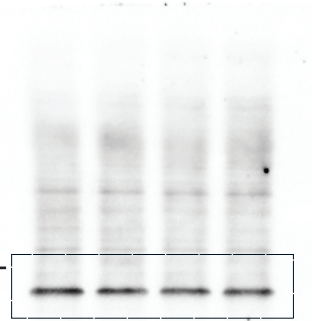

3e

total cell lysate  
emerin

37 kD —

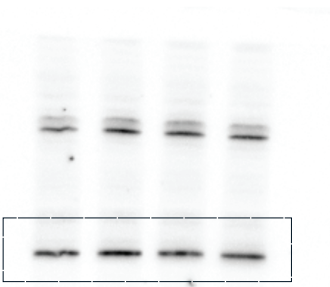

total cell lysate  
actin

37 kD —

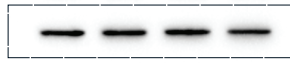

total cell lysate  
lamin AC

75 kD —

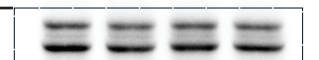

37 kD —

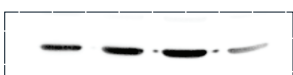

IP phospho Y  
emerin
